# Supplementary material for: Radiological and pathological integration predicts the efficacy of bevacizumab with chemotherapy in colorectal cancer liver metastases
Source: Research Square preprint supplement (doi:10.21203/rs.3.rs-7808212/v1), 2025-11-18
Supplement: Supplementary file 1 [file 2f185b1224ed42121aadcba4.xlsx]

## Sheet: Supplementary Table S1
Supplementary Table S1. Characteristics of all cohorts.
Characteristics		Radiomic model			Radiomic-pathomic model
		Training cohort (n = 120)	Internal test cohort (n = 50)	External test cohort (n = 47)	Training cohort (n = 61)	Test cohort (n = 27)
Age [mean(SD)]		54.8 ± 11.9	56.5 ± 9.7	62.3 ± 12.2	54.5 ± 11.8	56.8 ± 9.1
Gender (%)	female	51 (42.5%)	21 (42.0%)	20 (42.6%)	26 (42.6%)	9 (33.3%)
	male	69 (57.5%)	29 (58.0%)	27 (57.4%)	69 (57.4%)	18 (66.7%)
LN metastasis (%)	no	26 (21.7%)	9 (18.0%)	12 (25.5%)	15 (24.6%)	9 (33.3%)
	yes	94 (78.3%)	41 (82.0%)	35 (74.5%)	94 (75.4%)	41 (66.7%)
KRAS (%)	wild	52 (43.3%)	26 (52.0%)	12 (25.5%)	25 (41.0%)	15 (55.6%)
	mutant	68 (56.7%)	24 (48.0%)	20 (42.6%)	36 (59.0%)	12 (44.4%)
	missing	0 (0.0%)	0 (0.0%)	15 (31.9%)	0 (0.0%)	0 (0.0%)
NRAS (%)	wild	115 (95.8%)	50 (100.0%)	29 (61.7%)	57 (93.4%)	27 (100.0%)
	mutant	5 (4.2%)	0 (0.0%)	3 (6.4%)	4 (6.6%)	0 (0.0%)
	missing	0 (0.0%)	0 (0.0%)	15 (31.9%)	0 (0.0%)	0 (0.0%)
BRAF (%)	wild	114 (95.0%)	48 (96.0%)	31 (66.0%)	56 (91.8%)	26 (96.3%)
	mutant	6 (5.0%)	2 (4.0%)	1 (2.1%)	5 (8.2%)	1 (3.7%)
	missing	0 (0.0%)	0 (0.0%)	15 (31.9%)	0 (0.0%)	0 (0.0%)
PIK3CA (%)	wild	118 (98.3%)	50 (100.0%)	32 (68.1%)	60 (98.4%)	27 (100.0%)
	mutant	2 (1.7%)	0 (0.0%)	0 (0.0%)	1 (1.6%)	0 (0.0%)
	missing	0 (0.0%)	0 (0.0%)	15 (31.9%)	0 (0.0%)	0 (0.0%)
Pathological type (%)	adenocarcinoma	109 (90.8%)	45 (90.0%)	47 (100.0%)	54 (88.5%)	25 (92.6%)
	mucinous adenocarcinoma	11 (9.2%)	5 (10.0%)	0 (0.0%)	7 (11.5%)	2 (7.4%)
Location (%)	left colon	82 (68.3%)	32 (64.0%)	27 (57.4%)	43 (70.5%)	15 (55.6%)
	right colon	38 (31.7%)	18 (36.0%)	20 (42.6%)	18 (29.5%)	12 (44.4%)
Tumor number (%)	1	23 (19.2%)	4 (8.0%)	5 (10.6%)	8 (13.1%)	4 (14.8%)
	>1	97 (80.8%)	46 (92.0%)	42 (89.4%)	53 (86.9%)	23 (85.2%)
Metastasis site (%)	1	55 (45.8%)	21 (42.0%)	17 (36.2%)	29 (47.5%)	13 (48.1%)
	>1	65 (54.2%)	29 (58.0%)	30 (63.8%)	32 (52.5%)	14 (51.9%)
CEA (%)	≤5ug/L	31 (25.8%)	12 (24.0%)	6 (12.8%)	14 (23.0%)	9 (33.3%)
	>5ug/L	89 (74.2%)	38 (76.0%)	38 (80.9%)	47 (77.0%)	18 (66.7%)
	missing	0 (0.0%)	0 (0.0%)	3 (6.4%)	0 (0.0%)	0 (0.0%)
CA199 (%)	≤37U/mL	50 (41.7%)	18 (36.0%)	16 (34.0%)	21 (34.4%)	12 (44.4%)
	>37U/mL	70 (58.3%)	32 (64.0%)	28 (59.6%)	40 (65.6%)	15 (55.6%)
	missing	0 (0.0%)	0 (0.0%)	3 (6.4%)	0 (0.0%)	0 (0.0%)
Treatment (%)	Bevacizumab+FOLFIRI	32 (26.7%)	9 (18.0%)	8 (17.0%)	18 (29.5%)	8 (29.6%)
	Bevacizumab+mFOLFOX6	61 (50.8%)	31 (62.0%)	13 (27.7%)	34 (55.7%)	18 (66.7%)
	Bevacizumab+CapeOX	27 (22.5%)	10 (20.0%)	26 (55.3%)	9 (14.8%)	1 (3.7%)
Metastasis time (%)	metachronous metastases	58 (48.3%)	21 (42.0%)	27 (57.4%)	24 (39.3%)	10 (37.0%)
	synchronous metastases	62 (51.7%)	29 (58.0%)	20 (42.6%)	37 (60.7%)	17 (63.0%)
Tumor size (%)	<5cm	71 (59.2%)	26 (52.0%)	26 (55.3%)	30 (49.2%)	14 (51.9%)
	≥5cm	49 (40.8%)	24 (48.0%)	21 (44.7%)	31 (50.8%)	13 (48.1%)
Effect (%)	response	37 (30.8%)	15 (30.0%)	12 (25.5%)	18 (29.5%)	7 (25.9%)
	no response	83 (69.2%)	35 (70.0%)	35 (74.5%)	43 (70.5%)	20 (74.1%)
BOR (%)	PR	37 (30.8%)	15 (30.0%)	12 (25.5%)	18 (29.5%)	7 (25.9%)
	SD	50 (41.7%)	19 (38.0%)	21 (44.7%)	25 (41.0%)	10 (37.0%)
	PD	33 (27.5%)	16 (32.0%)	14 (29.8%)	18 (29.5%)	10 (37.0%)
Progression-free Survival [median(range)]		22.1 (15.1-43.1)	20.5 (14.9-20.0)	21.1 (10.8-28.0)	21.1 (13.4-40.1)	19.1 (14.0-23.2)
PFS status (%)	progressive	89 (74.2%)	32 (64.0%)	40 (85.1%)	45 (73.8%)	20 (74.1%)
	non-progressive or censored	31 (25.8%)	18 (36.0%)	7 (14.9%)	16 (26.2%)	7 (25.9%)
Overall Survival [median(range)]		39.2 (24.2-69.3)	30.7 (22.1-51.2)	38.9 (21.2-64.1)	34.6 (22.3-68.2)	37.8 (25.9-55.2)
OS status (%)	dead	73 (60.8%)	25 (50.0%)	28 (59.6%)	39 (63.9%)	20 (74.1%)
	alive or censored	47 (39.2%)	25 (50.0%)	19 (40.4%)	22 (36.1%)	7 (25.9%)

## Sheet: Supplementary Table S2
Supplementary Table S2. All radiomic features utilized in the model training process.
Feature	Rename
tumor_log_sigma_1_0_mm_3D_glszm_SmallAreaEmphasis	tumor1
tumor_wavelet_HHL_glrlm_LongRunLowGrayLevelEmphasis	tumor2
tumor_logarithm_ngtdm_Contrast	tumor3
tumor_log_sigma_1_0_mm_3D_glszm_SmallAreaLowGrayLevelEmphasis	tumor4
peritumor_log_sigma_3_0_mm_3D_firstorder_90Percentile	peritumor1
peritumor_original_shape_Elongation	peritumor2
peritumor_wavelet_LLH_gldm_DependenceNonUniformityNormalized	peritumor3
peritumor_square_glcm_MCC	peritumor4
peritumor_wavelet_HHH_glszm_SizeZoneNonUniformityNormalized	peritumor5
peritumor_square_ngtdm_Busyness	peritumor6
peritumor_lbp_3D_k_firstorder_Minimum	peritumor7
intratumor_wavelet_LHL_glszm_SmallAreaLowGrayLevelEmphasis	intratumor1
intratumor_wavelet_LHL_glszm_GrayLevelNonUniformityNormalized	intratumor2
intratumor_wavelet_HLL_glszm_LargeAreaHighGrayLevelEmphasis	intratumor3
intratumor_log_sigma_2_0_mm_3D_ngtdm_Strength	intratumor4
intratumor_wavelet_HHH_glszm_GrayLevelNonUniformityNormalized	intratumor5
ring_wavelet_HHL_glszm_LargeAreaLowGrayLevelEmphasis	ring1
ring_wavelet_HHL_glszm_GrayLevelNonUniformityNormalized	ring2
ring_wavelet_LHH_glszm_SmallAreaHighGrayLevelEmphasis	ring3
ring_log_sigma_5_0_mm_3D_glszm_SizeZoneNonUniformityNormalized	ring4
ring_squareroot_firstorder_10Percentile	ring5
ring_wavelet_HHH_firstorder_Skewness	ring6
ring_wavelet_HHL_firstorder_Kurtosis	ring7
ring_lbp_3D_k_glcm_Imc2	ring8

## Sheet: Supplementary Table S3
Supplementary Table S3. Predicting performance of single ROI-derived radiomic models.
Method	Training cohort				Internal test cohort
	Tumoral features	Peritumoral features	Intratumoral features	Ring-shaped features	Tumoral features	Peritumoral features	Intratumoral features	Ring-shaped features
AUC (95%CI)	0.73 (0.64-0.82)	0.81 (0.73-0.89)	0.78 (0.70-0.87)	0.75 (0.66-0.84)	0.71 (0.55-0.87)	0.79 (0.66-0.93)	0.77 (0.63-0.90)	0.74 (0.60-0.88)
Accuracy (95%CI)	0.69 (0.61-0.77)	0.75 (0.67-0.83)	0.75 (0.67-0.83)	0.70 (0.62-0.78)	0.70 (0.57-0.83)	0.68 (0.55-0.81)	0.72 (0.56-0.84)	0.70 (0.57-0.83)
Kappa (95%CI)	0.36 (0.20-0.53)	0.48 (0.32-0.64)	0.50 (0.34-0.65)	0.38 (0.21-0.54)	0.40 (0.14-0.65)	0.35 (0.092-0.61)	0.42 (0.17-0.68)	0.39 (0.13-0.65)
Sensitivity (95%CI)	0.68 (0.54-0.82)	0.73 (0.60-0.86)	0.82 (0.70-0.93)	0.68 (0.54-0.82)	0.71 (0.52-0.91)	0.67 (0.46-0.87)	0.67 (0.46-0.87)	0.67 (0.46-0.87)
Specificity (95%CI)	0.70 (0.59-0.80)	0.76 (0.67-0.86)	0.71 (0.61-0.81)	0.71 (0.61-0.81)	0.69 (0.52-0.86)	0.69 (0.52-0.86)	0.76 (0.60-0.91)	0.72 (0.56-0.89)
Recall (95%CI)	0.68 (0.54-0.82)	0.73 (0.60-0.86)	0.82 (0.70-0.93)	0.68 (0.54-0.82)	0.71 (0.52-0.91)	0.67 (0.46-0.87)	0.67 (0.46-0.87)	0.67 (0.46-0.87)
Precision (95%CI)	0.57 (0.43-0.70)	0.64 (0.51-0.77)	0.62 (0.50-0.75)	0.58 (0.44-0.71)	0.62 (0.43-0.82)	0.61 (0.41-0.81)	0.67 (0.46-0.87)	0.64 (0.43-0.84)
PPV (95%CI)	0.57 (0.43-0.70)	0.64 (0.51-0.77)	0.62 (0.50-0.75)	0.58 (0.44-0.71)	0.62 (0.43-0.82)	0.61 (0.41-0.81)	0.67 (0.46-0.87)	0.64 (0.43-0.84)
NPV (95%CI)	0.79 (0.69-0.89)	0.83 (0.74-0.92)	0.87 (0.79-0.95)	0.79 (0.70-0.89)	0.77 (0.61-0.93)	0.74 (0.57-0.91)	0.76 (0.60-0.91)	0.75 (0.59-0.91)
F1 score (95%CI)	0.62 (0.52-0.71)	0.68 (0.59-0.77)	0.71 (0.62-0.79)	0.62 (0.53-0.72)	0.67 (0.53-0.80)	0.64 (0.49-0.78)	0.67 (0.52-0.81)	0.65 (0.51-0.79)
Abbreviation: AUC, area under curve; PPV, positive predictive value; NPV, negative predictive value; CI, confidence interval.

## Sheet: Supplementary Table S4
Supplementary Table S4. Univariate and multivariate logistic analysis.
Training cohort
Characteristics		Univariate logistic regression		Multivariate logistic regression
		OR (95%CI)	P value	OR (95%CI)	P value
Age	<60	reference
	≥60	0.67 (0.31-1.46)	0.32
CA199	≤37U/mL	reference
	>37U/mL	1.42 (0.66-3.04)	0.37
CEA	≤5μg/L	reference
	>5μg/L	1.58 (0.65-3.84)	0.31
Gender	female	reference
	male	1.49 (0.70-3.2)	0.3
KRAS	wild	reference
	mutant	1.17 (0.55-2.48)	0.68
LN metastasis	no	reference
	yes	1.4 (0.55-3.54)	0.48
Location	left colon	reference
	right colon	0.72 (0.32-1.63)	0.43
Metastasis site	1	reference
	>1	0.77 (0.36-1.62)	0.49
Metastasis time	metachronous metastases	reference
	synchronous metastases	0.5 (0.24-1.07)	0.074	0.61 (0.23-1.58)	0.31
Radiomic model	low TRIP score	reference
	high TRIP score	19.8 (7.64-51.35)	<0.001	19.06 (7.32-49.65)	<0.001
Treatment	Bevacizumab+FOLFIRI	reference
	Bevacizumab+mFOLFOX6	1.01 (0.42-2.42)	0.97
	Bevacizumab+CapeOX	0.42 (0.13-1.32)	0.14
Tumor number	1	reference
	>1	0.7 (0.28-1.77)	0.45
Tumor size	<5cm	reference
	≥5cm	1.35 (0.64-2.87)	0.43
Internal test cohort
Characteristics		Univariate logistic regression		Multivariate logistic regression
		OR (95%CI)	P value	OR (95%CI)	P value
Age	<60	reference
	≥60	0.25 (0.07-0.93)	0.039	0.39 (0.08-1.87)	0.24
CA199	≤37U/mL	reference
	>37U/mL	0.86 (0.27-2.75)	0.79
CEA	≤5μg/L	reference
	>5μg/L	1.02 (0.27-3.8)	0.98
Gender	female	reference
	male	0.67 (0.22-2.1)	0.49
KRAS	wild	reference
	mutant	2.66 (0.84-8.46)	0.098	2.14 (0.5-9.2)	0.31
LN metastasis	no	reference
	yes	1.57 (0.34-7.13)	0.56
Location	left colon	reference
	right colon	0.57 (0.17-1.88)	0.35
Metastasis site	1	reference
	>1	1.32 (0.42-4.15)	0.63
Metastasis time	metachronous metastases	reference
	synchronous metastases	0.67 (0.22-2.1)	0.49
Radiomic model	low TRIP score	reference
	high TRIP score	15.62 (3.78-64.51)	<0.001	13.85 (3.17-60.56)	<0.001
Treatment	Bevacizumab+FOLFIRI	reference
	Bevacizumab+mFOLFOX6	1.44 (0.3-6.87)	0.64
	Bevacizumab+CapeOX	2 (0.31-12.84)	0.46
Tumor number	1	reference
	>1	0.7 (0.09-5.44)	0.74
Tumor size	<5cm	reference
	≥5cm	1.35 (0.44-4.18)	0.60
External test cohort
Characteristics		Univariate logistic regression		Multivariate logistic regression
		OR (95%CI)	P value	OR (95%CI)	P value
Age	<60	reference
	≥60	4.67 (1.11-19.65)	0.036	4.65 (0.92-23.58)	0.063
CA199	≤37U/mL	reference
	>37U/mL	1.22 (0.36-4.2)	0.75
CEA	≤5μg/L	reference
	>5μg/L	0.58 (0.1-3.23)	0.53
Gender	female	reference
	male	0.88 (0.27-2.89)	0.84
KRAS	wild	reference
	mutant	3.27 (0.87-12.33)	0.081	2.25 (0.51-9.95)	0.28
LN metastasis	no	reference
	yes	1.33 (0.34-5.29)	0.68
Location	left colon	reference
	right colon	1.13 (0.35-3.72)	0.84
Metastasis site	1	reference
	>1	2.84 (0.75-10.76)	0.12
Metastasis time	metachronous metastases	reference
	synchronous metastases	1.13 (0.35-3.72)	0.84
Radiomic model	low TRIP score	reference
	high TRIP score	4.94 (1.38-17.65)	0.014	4.59 (1.04-20.35)	0.045
Treatment	Bevacizumab+FOLFIRI	reference
	Bevacizumab+mFOLFOX6	1.33 (0.18-9.73)	0.78
	Bevacizumab+CapeOX	2.57 (0.44-15.19)	0.3
Tumor number	1	reference
	>1	2.72 (0.28-26.49)	0.39
Tumor size	<5cm	reference
	≥5cm	2.99 (0.88-10.1)	0.078	1.60 (0.38-6.75)	0.52

## Sheet: Supplementary Table S5
Supplementary Table S5. Univariate and multivariate Cox analysis of progression-free survival.
Training cohort
Characteristics		Univariate Cox regression		Multivariate Cox regression
		HR (95%CI)	P value	HR (95%CI)	P value
Age	<60	reference
	≥60	0.82 (0.53-1.26)	0.36
CA199	≤37U/mL	reference
	>37U/mL	1.12 (0.73-1.72)	0.6
CEA	≤5μg/L	reference
	>5μg/L	1.55 (0.95-2.53)	0.081	1.22 (0.74-2.02)	0.43
Gender	female	reference
	male	1.15 (0.75-1.76)	0.53
KRAS	wild	reference
	mutant	1.04 (0.68-1.58)	0.86
LN metastasis	no	reference
	yes	0.88 (0.54-1.41)	0.59
Location	left colon	reference
	right colon	0.85 (0.53-1.34)	0.48
Metastasis site	1	reference
	>1	0.87 (0.57-1.33)	0.52
Metastasis time	metachronous metastases	reference
	synchronous metastases	1.04 (0.69-1.59)	0.84
Radiomic model	low TRIP score	reference
	high TRIP score	3.71 (2.39-5.77)	<0.001	4.11 (2.6-6.49)	<0.001
Treatment	Bevacizumab+FOLFIRI	reference
	Bevacizumab+mFOLFOX6	0.99 (0.61-1.59)	0.95	1.17 (0.71-1.91)	0.54
	Bevacizumab+CapeOX	0.56 (0.3-1.05)	0.069	0.54 (0.29-1.01)	0.055
Tumor number	1	reference
	>1	0.79 (0.48-1.31)	0.36
Tumor size	<5cm	reference
	≥5cm	1.08 (0.71-1.65)	0.72
Internal test cohort
Characteristics		Univariate Cox regression		Multivariate Cox regression
		HR (95%CI)	P value	HR (95%CI)	P value
Age	<60	reference
	≥60	0.51 (0.23-1.14)	0.1
CA199	≤37U/mL	reference
	>37U/mL	1.46 (0.68-3.16)	0.33
CEA	≤5μg/L	reference
	>5μg/L	1.59 (0.69-3.64)	0.27
Gender	female	reference
	male	0.86 (0.43-1.73)	0.67
KRAS	wild	reference
	mutant	1.54 (0.75-3.14)	0.23
LN metastasis	no	reference
	yes	2.29 (0.76-6.89)	0.14
Location	left colon	reference
	right colon	0.95 (0.45-1.97)	0.88
Metastasis site	1	reference
	>1	1.37 (0.67-2.81)	0.38
Metastasis time	metachronous metastases	reference
	synchronous metastases	1.05 (0.52-2.13)	0.89
Radiomic model	low TRIP score	reference
	high TRIP score	4.96 (2.36-10.46)	<0.001	4.96 (2.36-10.46)	<0.001
Treatment	Bevacizumab+FOLFIRI	reference
	Bevacizumab+mFOLFOX6	1.26 (0.47-3.36)	0.64
	Bevacizumab+CapeOX	0.96 (0.29-3.15)	0.94
Tumor number	1	reference
	>1	0.94 (0.28-3.13)	0.92
Tumor size	<5cm	reference
	≥5cm	1.42 (0.69-2.94)	0.34
External test cohort
Characteristics		Univariate Cox regression		Multivariate Cox regression
		HR (95%CI)	P value	HR (95%CI)	P value
Age	<60	reference
	≥60	2.19 (1.11-4.33)	0.025	1.77 (0.89-3.54)	0.1
CA199	≤37U/mL	reference
	>37U/mL	1.72 (0.86-3.43)	0.13
CEA	≤5μg/L	reference
	>5μg/L	1.19 (0.46-3.09)	0.72
Gender	female	reference
	male	0.78 (0.41-1.46)	0.43
KRAS	wild	reference
	mutant	2.03 (1.02-4.05)	0.045	1.54 (0.73-3.23)	0.25
LN metastasis	no	reference
	yes	0.95 (0.46-1.96)	0.88
Location	left colon	reference
	right colon	0.76 (0.39-1.45)	0.4
Metastasis site	1	reference
	>1	1.93 (0.98-3.82)	0.059	1.63 (0.78-3.39)	0.19
Metastasis time	metachronous metastases	reference
	synchronous metastases	0.77 (0.4-1.5)	0.45
Radiomic model	low TRIP score	reference
	high TRIP score	2.38 (1.23-4.61)	0.01	2.28 (1.16-4.46)	0.016
Treatment	Bevacizumab+FOLFIRI	reference
	Bevacizumab+mFOLFOX6	1.68 (0.68-4.16)	0.26
	Bevacizumab+CapeOX	1.24 (0.45-3.48)	0.68
Tumor number	1	reference
	>1	2.54 (0.77-8.35)	0.12
Tumor size	<5cm	reference
	≥5cm	1.65 (0.86-3.17)	0.13

## Sheet: Supplementary Table S6
Supplementary Table S6. Univariate and multivariate Cox analysis of overall survival.
Training cohort
Characteristics		Univariate Cox regression		Multivariate Cox regression
		HR (95%CI)	P value	HR (95%CI)	P value
Age	<60	reference
	≥60	0.88 (0.53-1.45)	0.61
CA199	≤37U/mL	reference
	>37U/mL	1.53 (0.95-2.46)	0.083	1.15 (0.66-2)	0.62
CEA	≤5μg/L	reference
	>5μg/L	1.82 (1.04-3.18)	0.035	1.26 (0.65-2.45)	0.5
Gender	female	reference
	male	1.07 (0.66-1.73)	0.77
KRAS	wild	reference
	mutant	1.12 (0.7-1.79)	0.63
LN metastasis	no	reference
	yes	1.54 (0.9-2.65)	0.12
Location	left colon	reference
	right colon	0.66 (0.39-1.12)	0.12
Metastasis site	1	reference
	>1	0.85 (0.54-1.35)	0.5
Metastasis time	metachronous metastases	reference
	synchronous metastases	1.68 (1.04-2.71)	0.035	1.76 (1.03-2.99)	0.038
Radiomic model	low TRIP score	reference
	high TRIP score	1.78 (1.12-2.84)	0.015	1.93 (1.18-3.16)	0.009
Treatment	Bevacizumab+FOLFIRI	reference
	Bevacizumab+mFOLFOX6	1.51 (0.89-2.55)	0.12
	Bevacizumab+CapeOX	0.68 (0.32-1.42)	0.3
Tumor number	1	reference
	>1	0.81 (0.47-1.4)	0.45
Tumor size	<5cm	reference
	≥5cm	1.14 (0.72-1.82)	0.57
Internal test cohort
Characteristics		Univariate Cox regression		Multivariate Cox regression
		HR (95%CI)	P value	HR (95%CI)	P value
Age	<60	reference
	≥60	0.75 (0.28-2.03)	0.57
CA199	≤37U/mL	reference
	>37U/mL	1.32 (0.58-3.03)	0.51
CEA	≤5μg/L	reference
	>5μg/L	1.5 (0.61-3.68)	0.38
Gender	female	reference
	male	1.4 (0.62-3.19)	0.42
KRAS	wild	reference
	mutant	1.39 (0.61-3.14)	0.43
LN metastasis	no	reference
	yes	2.74 (0.78-9.61)	0.11
Location	left colon	reference
	right colon	1.52 (0.61-3.79)	0.37
Metastasis site	1	reference
	>1	1.21 (0.53-2.78)	0.65
Metastasis time	metachronous metastases	reference
	synchronous metastases	3.4 (1.28-9.03)	0.014	6.33 (1.94-20.67)	0.002
Radiomic model	low TRIP score	reference
	high TRIP score	2.3 (1.01-5.22)	0.046	3.69 (1.42-9.57)	0.007
Treatment	Bevacizumab+FOLFIRI	reference
	Bevacizumab+mFOLFOX6	2.13 (0.7-6.45)	0.18
	Bevacizumab+CapeOX	1.23 (0.27-5.65)	0.79
Tumor number	1	reference
	>1	1.15 (0.27-4.97)	0.85
Tumor size	<5cm	reference
	≥5cm	2.57 (1.09-6.05)	0.031	2.1 (0.88-5.02)	0.095

## Sheet: Supplementary Table S7
Supplementary Table S7. Calibration of radiomic and radiomic-pathomic model.
Method		Training cohort (n = 61)		Test cohort (n = 27)
		radiomic model	radiomic-pathomic model	radiomic model	radiomic-pathomic model
Brier score		0.20	0.11	0.22	0.12
Spiegelhalter test	z statistic	-0.50	<0.001	0.14	0.40
	P value	0.62	1	0.89	0.69

## Sheet: Supplementary Table S8
Supplementary Table S8. NRI test and IDI test of radiomic-pathomic model compared with radiomic model.
Comparison	Training cohort				Test cohort
	NRI (95%CI)	P value	IDI (95%CI)	P value	NRI (95%CI)	P value	IDI (95%CI)	P value
radiomic model vs pathomic model	-0.25 (-0.75 - 0.24)	0.32	-0.026 (-0.13 - 0.079)	0.63	0.52 (-0.21 - 1.25)	0.16	0.10 (-0.098 - 0.30)	0.31
radiomic-pathomic hybrid model vs radiomic model	0.96 (0.50 - 1.41)	<0.001	0.38 (0.26 - 0.50)	<0.001	0.96 (0.29 - 1.62)	0.005	0.35 (0.14 - 0.56)	0.001
radiomic-pathomic hybrid model vs pathomic model	1.15 (0.72 - 1.57)	<0.001	0.36 (0.22 - 0.49)	<0.001	1.41 (0.87 - 1.94)	<0.001	0.45 (0.26 - 0.65)	<0.001

## Sheet: Supplementary Table S9
Supplementary Table S9. Univariate and multivariate logistic analysis with radiomic-pathomic model.
Training cohort
Characteristics		Univariate logistic regression		Multivariate logistic regression
		OR (95%CI)	P value	OR (95%CI)	P value
Age	<60	reference
	≥60	0.66 (0.23-1.91)	0.44
CA199	≤37U/mL	reference
	>37U/mL	1.48 (0.49-4.45)	0.49
CEA	≤5μg/L	reference
	>5μg/L	1.22 (0.35-4.22)	0.75
Gender	female	reference
	male	1.89 (0.65-5.5)	0.24
KRAS	wild	reference
	mutant	1.27 (0.44-3.63)	0.66
LN metastasis	no	reference
	yes	2.12 (0.59-7.64)	0.25
Location	left colon	reference
	right colon	0.33 (0.09-1.16)	0.084	0.44 (0.07-2.90)	0.4
Metastasis site	1	reference
	>1	1.12 (0.4-3.14)	0.83
Metastasis time	metachronous metastases	reference
	synchronous metastases	0.48 (0.17-1.38)	0.17
Radiopathomic model	low RP-TRIP score	reference
	high RP-TRIP score	108 (12.07-966.24)	<0.001	101.21 (11.2-914.93)	<0.001
Treatment	Bevacizumab+FOLFIRI	reference
	Bevacizumab+mFOLFOX6	1.78 (0.54-5.84)	0.34
	Bevacizumab+CapeOX	0.57 (0.09-3.64)	0.55
Tumor number	1	reference
	>1	2.13 (0.39-11.55)	0.38
Tumor size	<5cm	reference
	≥5cm	1.65 (0.58-4.65)	0.35
Test cohort
Characteristics		Univariate logistic regression		Multivariate logistic regression
		OR (95%CI)	P value	OR (95%CI)	P value
Age	<60	reference
	≥60	0.8 (0.16-3.99)	0.78
CA199	≤37U/mL	reference
	>37U/mL	1.6 (0.35-7.4)	0.55
CEA	≤5μg/L	reference
	>5μg/L	2.5 (0.47-13.27)	0.28
Gender	female	reference
	male	0.32 (0.06-1.71)	0.18
KRAS	wild	reference
	mutant	4 (0.8-20.02)	0.092	3.53 (0.45-27.53)	0.23
LN metastasis	no	reference
	yes	0.64 (0.13-3.2)	0.59
Location	left colon	reference
	right colon	1.14 (0.25-5.22)	0.86
Metastasis site	1	reference
	>1	2.13 (0.46-9.94)	0.33
Metastasis time	metachronous metastases	reference
	synchronous metastases	0.89 (0.19-4.24)	0.88
Radiopathomic model	low RP-TRIP score	reference
	high RP-TRIP score	29.25 (2.79-306.78)	0.005	27.49 (2.44-309.6)	0.007
Treatment	Bevacizumab+FOLFIRI	reference
	Bevacizumab+mFOLFOX6	1 (0.19-5.29)	1
	Bevacizumab+CapeOX	0 (0-Inf)	0.99
Tumor number	1	reference
	>1	3.27 (0.29-36.31)	0.33
Tumor size	<5cm	reference
	≥5cm	2.88 (0.6-13.75)	0.18

## Sheet: Supplementary Table S10
Supplementary Table S10. Univariate and multivariate Cox analysis of progression-free survival with radiomic-pathomic model.
Training cohort
Characteristics		Univariate Cox regression		Multivariate Cox regression
		HR (95%CI)	P value	HR (95%CI)	P value
Age	<60	reference
	≥60	0.59 (0.32-1.09)	0.092	0.61 (0.33-1.14)	0.12
CA199	≤37U/mL	reference
	>37U/mL	1.05 (0.56-1.96)	0.88
CEA	≤5μg/L	reference
	>5μg/L	1.17 (0.58-2.37)	0.66
Gender	female	reference
	male	1.18 (0.65-2.15)	0.58
KRAS	wild	reference
	mutant	1.32 (0.73-2.39)	0.36
LN metastasis	no	reference
	yes	1.13 (0.6-2.12)	0.71
Location	left colon	reference
	right colon	0.49 (0.24-1.03)	0.059	0.71 (0.33-1.56)	0.4
Metastasis site	1	reference
	>1	1.1 (0.61-1.97)	0.76
Metastasis time	metachronous metastases	reference
	synchronous metastases	1.1 (0.62-1.98)	0.74
Radiopathomic model	low RP-TRIP score	reference
	high RP-TRIP score	1.97 (1.08-3.59)	0.027	2.08 (1.11-3.91)	0.022
Treatment	Bevacizumab+FOLFIRI	reference
	Bevacizumab+mFOLFOX6	1.85 (0.96-3.59)	0.068	1.83 (0.92-3.64)	0.084
	Bevacizumab+CapeOX	0.75 (0.27-2.12)	0.59	0.85 (0.3-2.4)	0.75
Tumor number	1	reference
	>1	1.05 (0.47-2.35)	0.91
Tumor size	<5cm	reference
	≥5cm	0.99 (0.56-1.76)	0.97
Test cohort
Characteristics		Univariate Cox regression		Multivariate Cox regression
		HR (95%CI)	P value	HR (95%CI)	P value
Age	<60	reference
	≥60	0.93 (0.33-2.62)	0.89
CA199	≤37U/mL	reference
	>37U/mL	1.35 (0.5-3.65)	0.55
CEA	≤5μg/L	reference
	>5μg/L	2.18 (0.69-6.94)	0.19
Gender	female	reference
	male	0.5 (0.19-1.27)	0.14
KRAS	wild	reference
	mutant	1.85 (0.72-4.73)	0.2
LN metastasis	no	reference
	yes	0.83 (0.31-2.21)	0.7
Location	left colon	reference
	right colon	1.82 (0.7-4.73)	0.22
Metastasis site	1	reference
	>1	2.79 (0.93-8.37)	0.066	2 (0.62-6.42)	0.24
Metastasis time	metachronous metastases	reference
	synchronous metastases	1.16 (0.44-3.03)	0.77
Radiopathomic model	low RP-TRIP score	reference
	high RP-TRIP score	3.95 (1.38-11.31)	0.011	3.1 (1.03-9.34)	0.044
Treatment	Bevacizumab+FOLFIRI	reference
	Bevacizumab+mFOLFOX6	1.03 (0.12-8.95)	0.98
	Bevacizumab+CapeOX	1.18 (0.41-3.37)	0.76
Tumor number	1	reference
	>1	2.05 (0.46-9.14)	0.35
Tumor size	<5cm	reference
	≥5cm	1.65 (0.64-4.25)	0.3
