# Supplementary material for: Radiological and pathological integration predicts the efficacy of bevacizumab with chemotherapy in colorectal cancer liver metastases
Source: Research Square preprint supplement (doi:10.21203/rs.3.rs-7808212/v1), 2025-11-18
Supplement: Supplementary file 2 [file a661acaae2752bedf820d6cd.docx]

Supplementary Materials for

**Radiological and p****athological integration predicts the efficacy of bevacizumab with chemotherapy in colorectal cancer liver metastases**

**Supplementary Figures**

Supplementary Fig. S1.


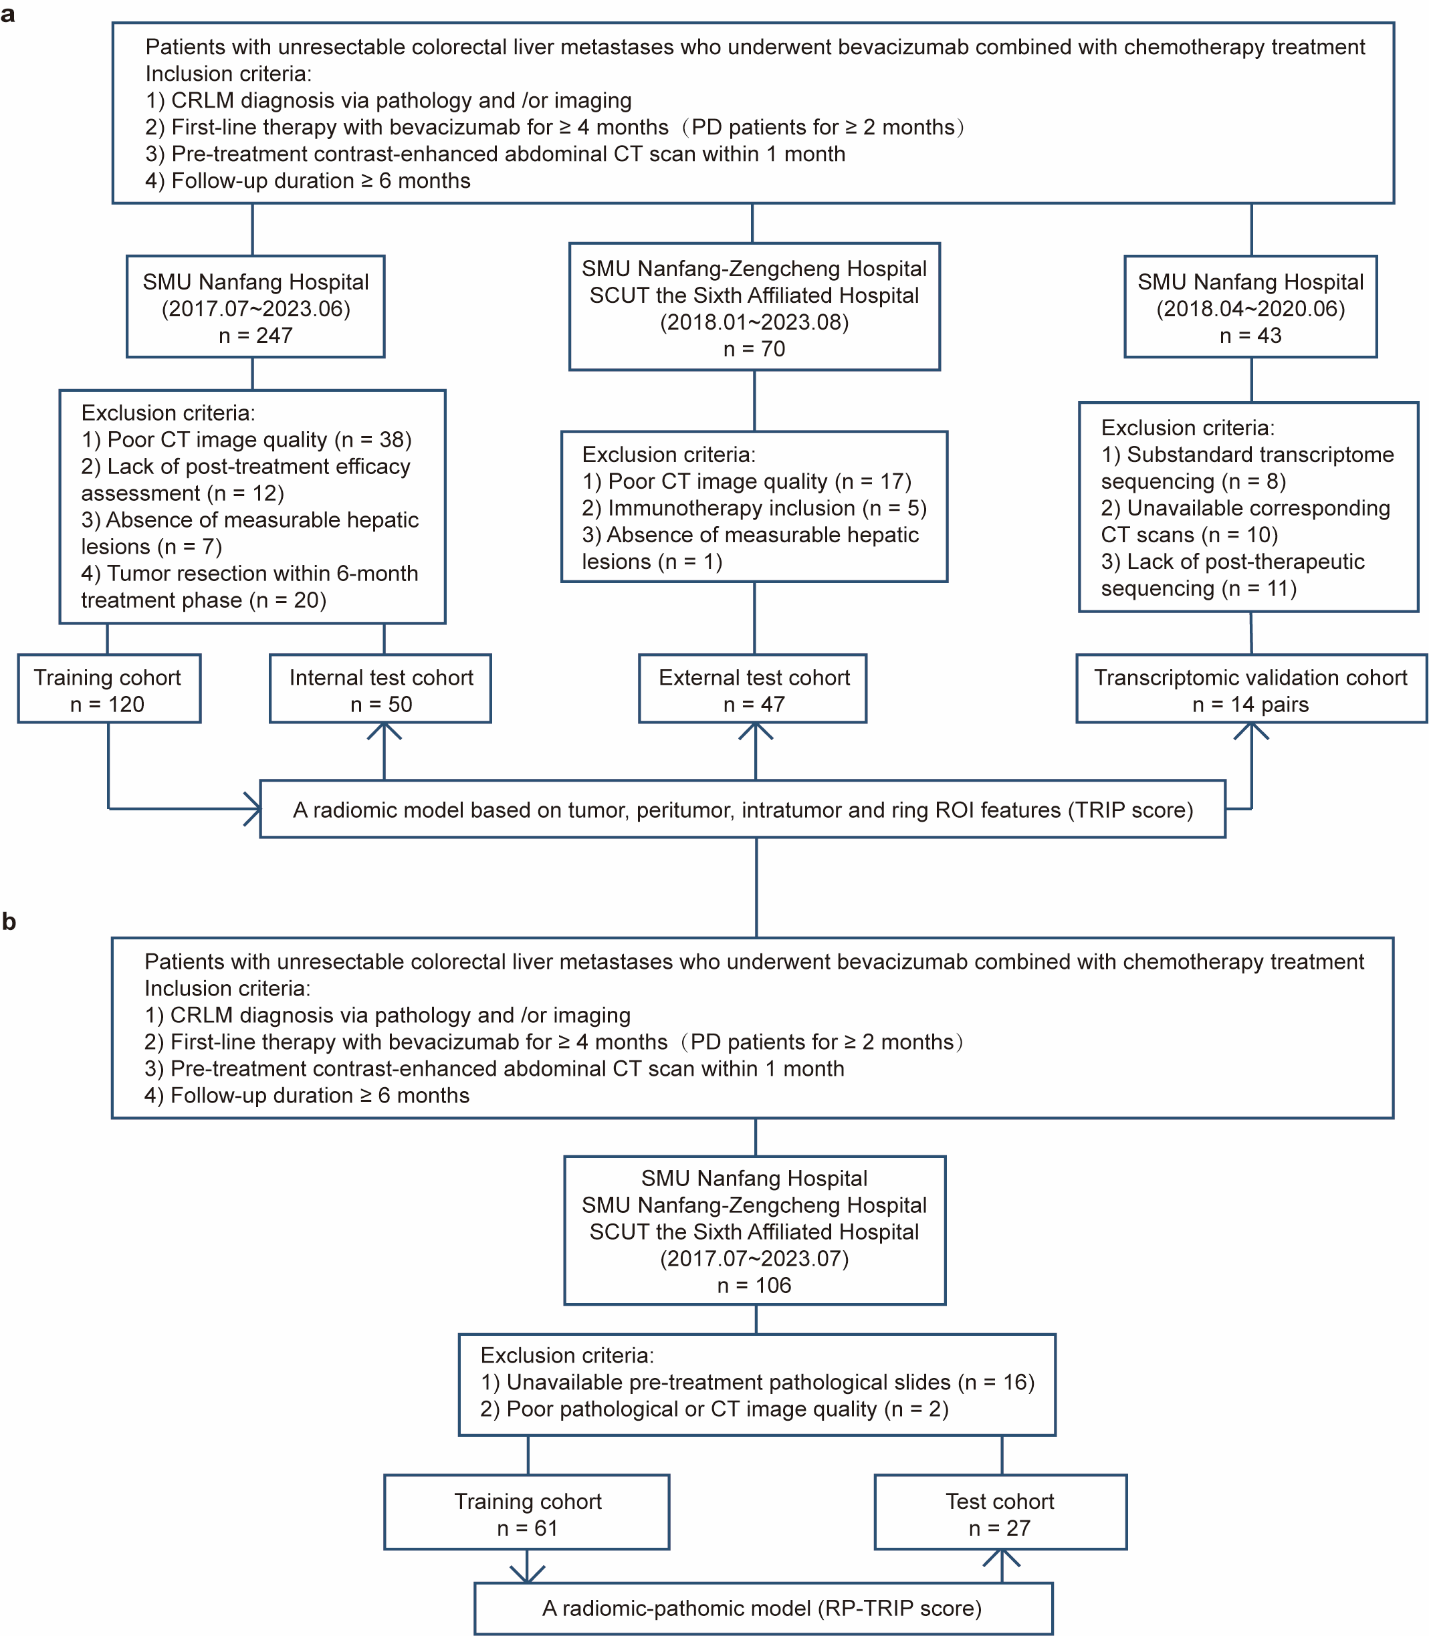


**Supplementary Fig. S1. The inclusion and exclusion criteria for all cohorts.** Abbreviations: CRLM, colorectal liver metastasis; PD, progressive disease; SMU, Southern Medical University; SCUT, South China University of Technology; ROI, region of interest.

Supplementary Fig. S2.


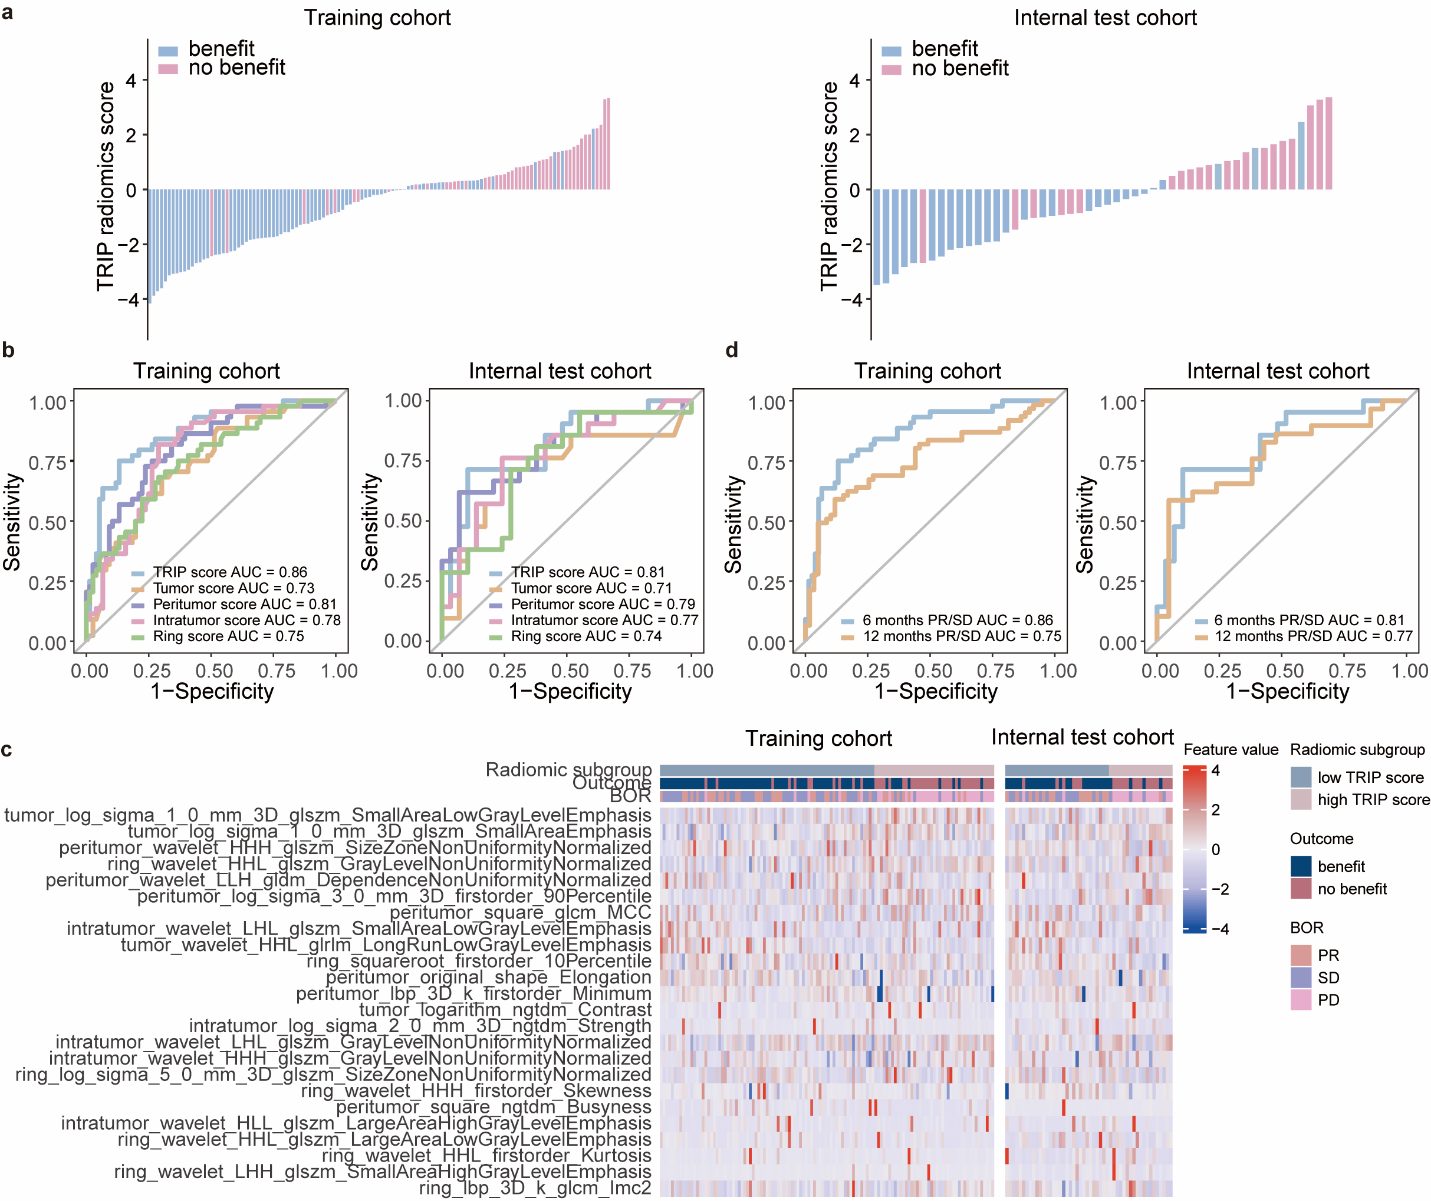


**Supplementary Fig. S2.** **Additional evaluations of radiomic scores.** **a** Waterfall plots showing radiomic scores arranged in ascending order for both the training cohort and the internal test cohort. **b** ROC curves of models derived from all regions (blue), the tumoral region (orange), the peritumoral region (purple), the intratumoral region (pink), and the ring-shaped region (green) in both the training cohort and the internal test cohort. **c** Heatmap displaying the relationship between the selected radiomic features and predictive outcomes. **d** ROC curves of TRIP model predicting 12-month PR/SD (orange) and 6-month PR/SD (blue) in both cohorts. Abbreviations: ROC, receiver operator characteristic; AUC, area under the curve; PR, partial response; SD, stable disease.

Supplementary Fig. S3.


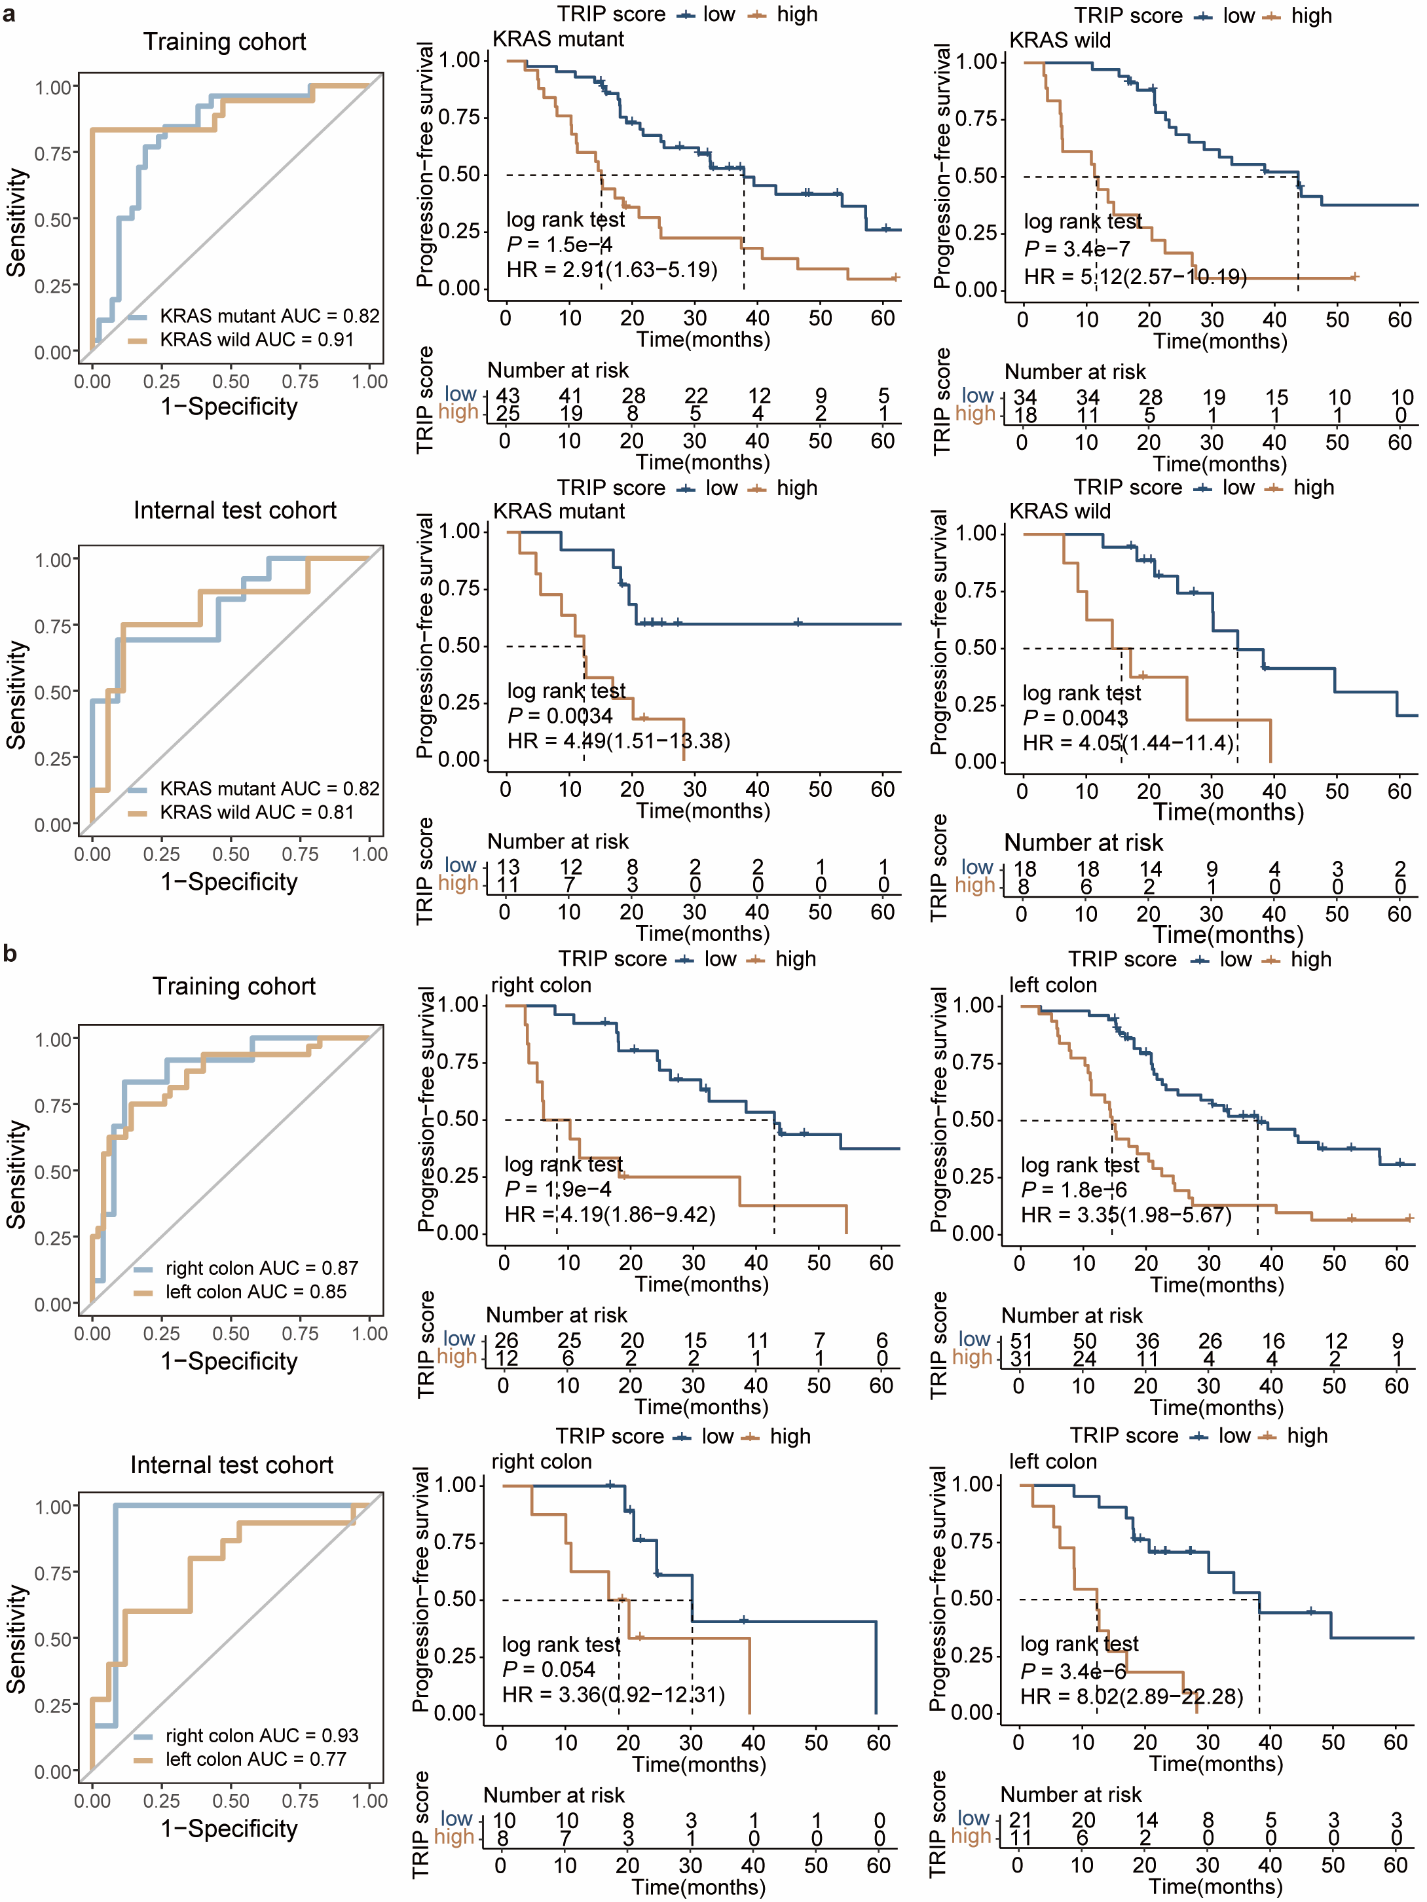


**Supplementary Fig. S3. Stratified analysis.** Focusing on KRAS mutation status **a** and primary tumor location **b** in the training cohort (upper) and the internal test cohort (lower).

Supplementary Fig. S4.


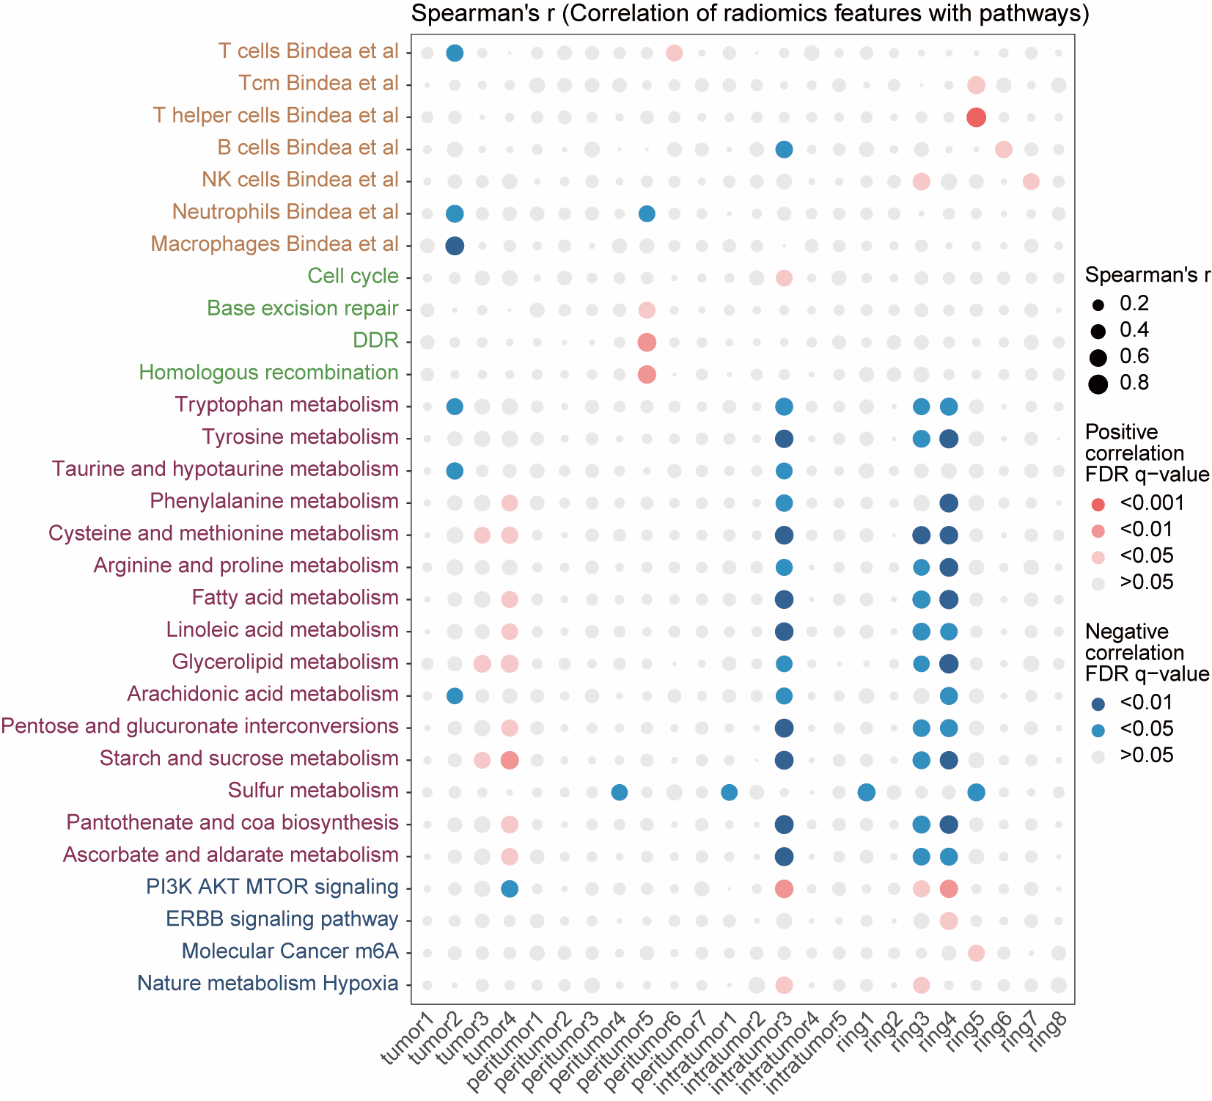


**Supplementary Fig.S4. Biological explanation of radiomic features.** Spearman’s correlation analysis of radiomic features, cell signatures, and biological pathways.

Supplementary Fig. S5.


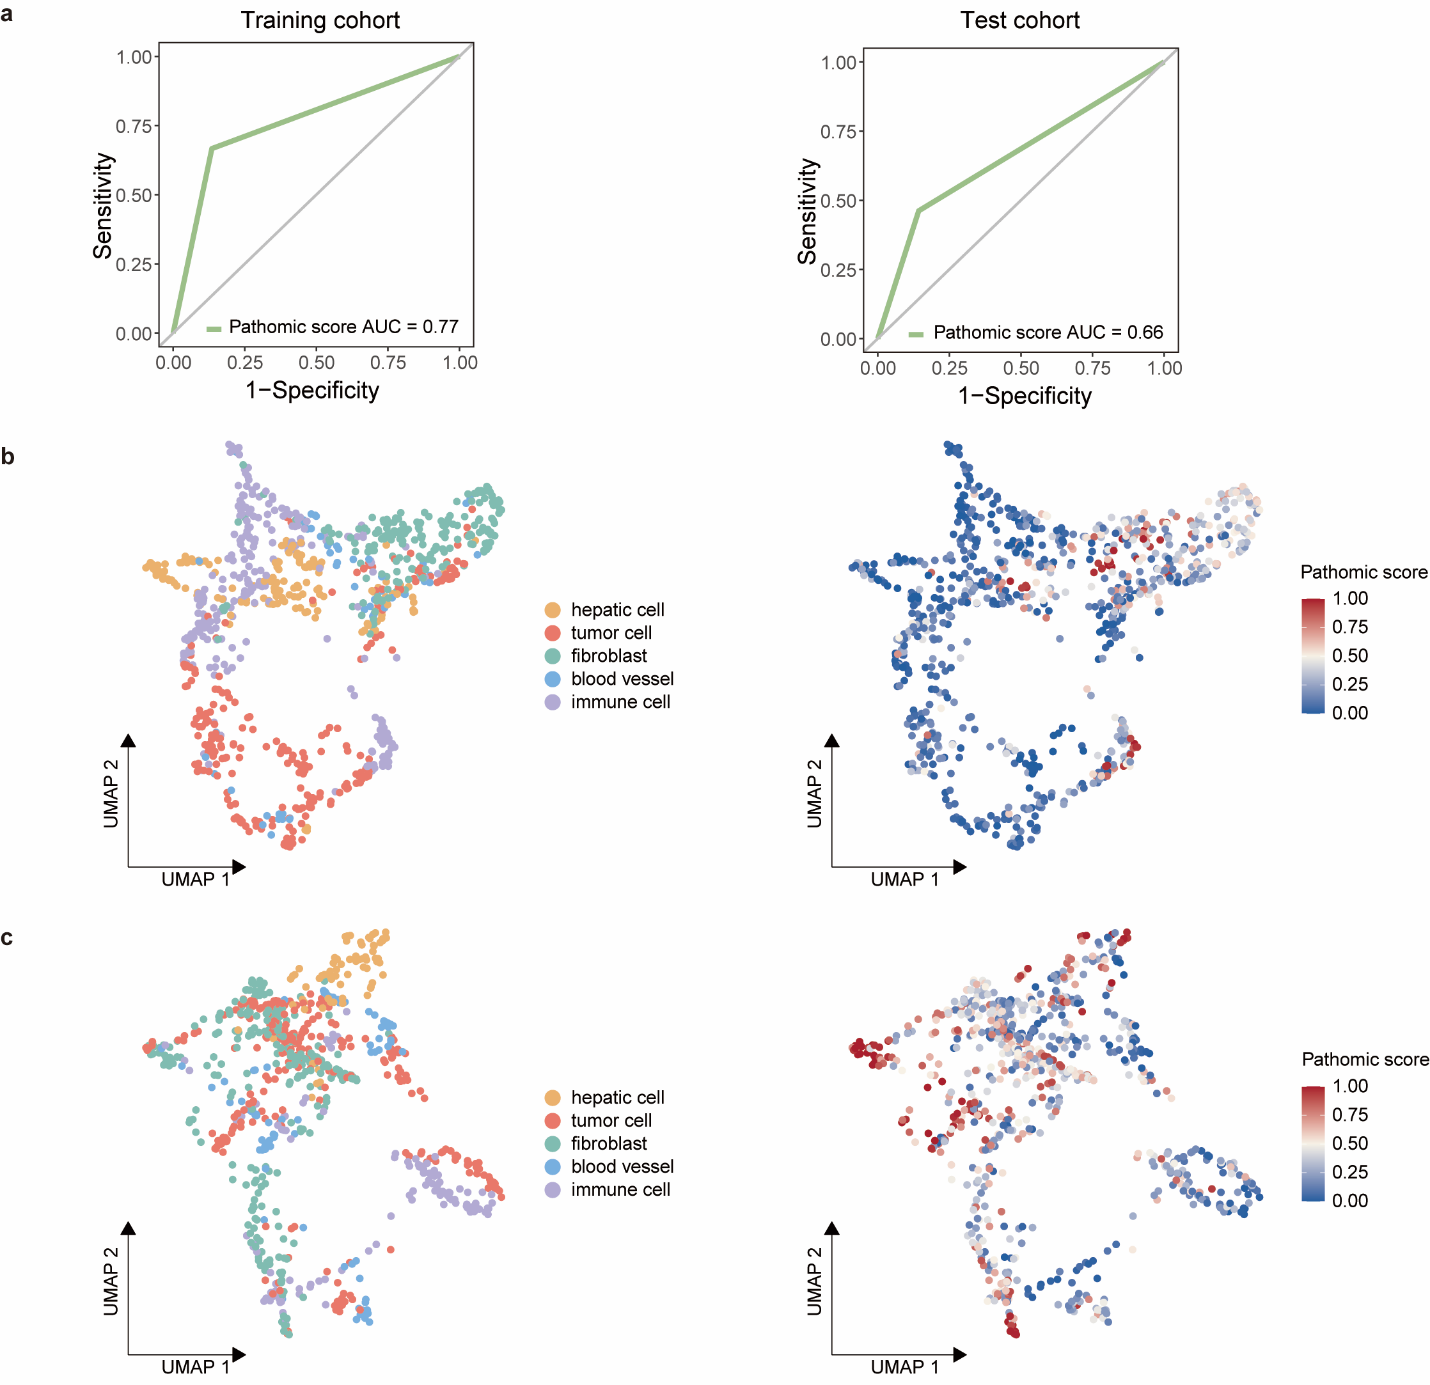


**Supplementary Fig.S5. Development and interpretation of the pathomic signature. a** ROC curves of pathomic model in the training cohort (left) and the test cohort (right). UMAP visualization of sensitive subgroups **b** and resistant subgroups. **c** The patches were denoted as 5 components, including hepatic cells (orange), tumor cells (red), fibroblasts (green), blood vessels (blue), and immune cells (purple), or as high predicted possibilities (red) and low predicted possibilities (blue). Each dot represents a patch (~0.5μm/pixel).

Supplementary Fig. S6.


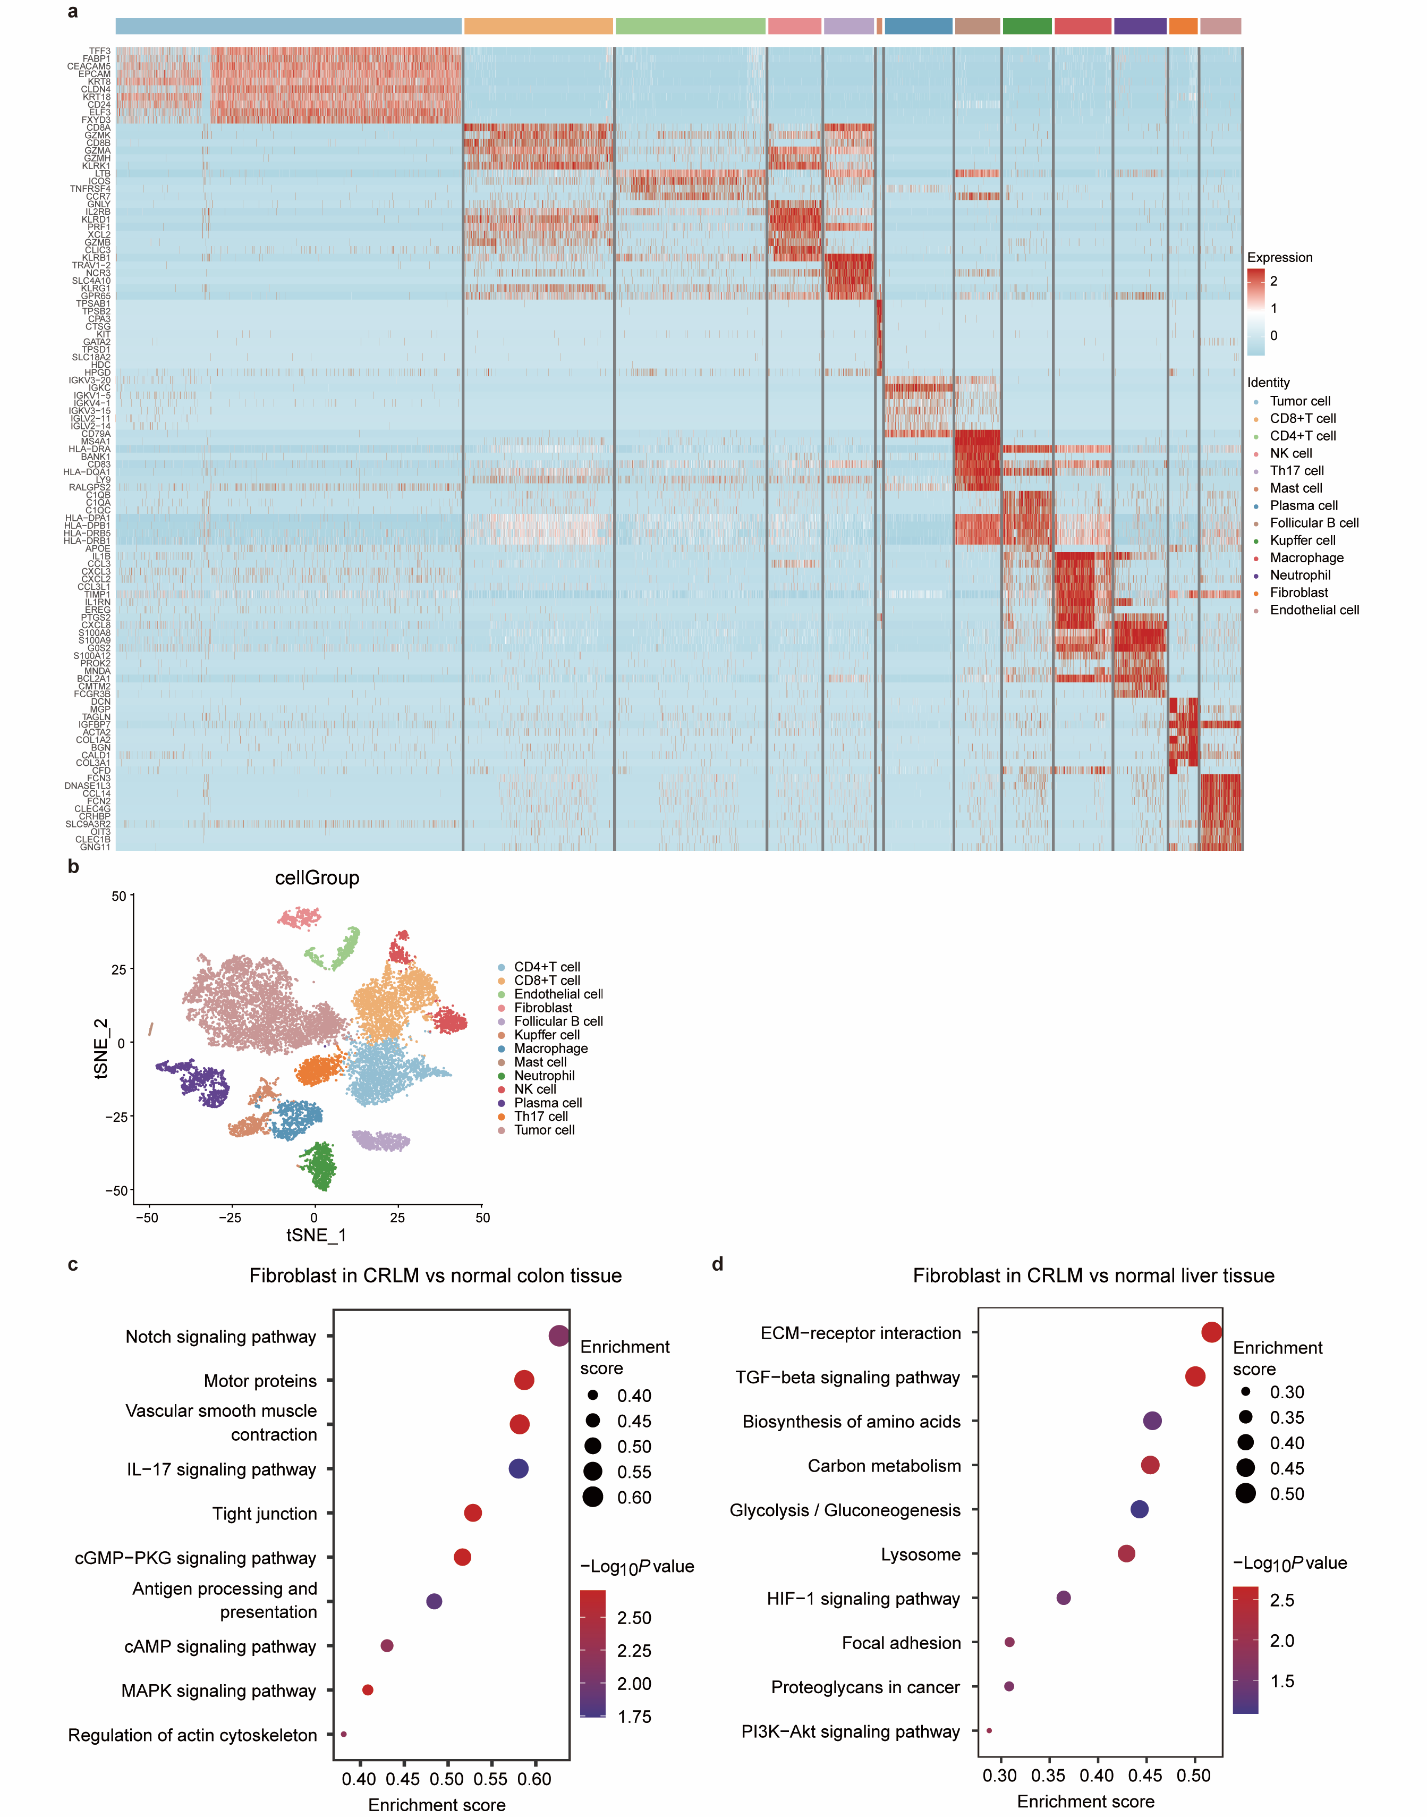


**Supplementary Fig.S6. External validation at the single-cell level.** Visualization of single-cell RNA sequencing analysis (GSE245552) using a heatmap **a** and a t-SNE plot **b**. Comparison of the oncogenic properties of fibroblasts between CRLM and normal colon tissue **c** or normal liver tissue **d** through KEGG analysis.

**Supplementary Tables**

**Legends for Tables S1 to S10**

**Supplementary Table S1. Characteristics of all cohorts.**

**Supplementary Table S2. All radiomic features utilized in the model training process.**

**Supplementary Table S3. Predicting the performance of single ROI-derived radiomic models.**

**Supplementary Table S4. Univariate and multivariate logistic analysis.**

**Supplementary Table S5. Univariate and multivariate Cox analysis of progression-free survival.**

**Supplementary Table S6. Univariate and multivariate Cox analysis of overall survival.**

**Supplementary Table S7. Calibration of radiomic models and radiomic-pathomic models.**

**Supplementary Table S8. NRI test and IDI test of the radiomic-pathomic model compared with the radiomic model.**

**Supplementary Table S9. Univariate and multivariate logistic analysis using radiomic-pathomic model.**

**Supplementary Table S10. Univariate and multivariate Cox analysis of progression-free survival using the radiomic-pathomic model.**
